# Supplementary material
Source: ML conference proceedings conference paper supplement (https://openaccess.thecvf.com/content/WACV_2020/html/Belouadah_ScaIL_Classifier_Weights_WACV_2020_paper.html)
Supplement: Supplementary file 1 [file Belouadah_ScaIL_Classifier_Weights_WACV_2020_supplemental.pdf]

# Supplementary material for "ScaIL: Classifier Weights Scaling for Class Incremental Learning"

Eden Belouadah, Adrian Popescu

Université Paris-Saclay, CEA, Département Intelligence Ambiante et Systèmes Interactifs,  
91191 Gif-sur-Yvette, France

eden.belouadah, adrian.popescu@cea.fr

## 1. Introduction

In this supplementary material, we provide:

- a more detailed discussion of  $G_{IL}$ , the proposed aggregated evaluation score;
- results for fine tuning with  $\mathcal{B} = 0$ , i.e. without past exemplars memory;
- supplementary experiments related to the role of distillation in class incremental learning;
- algorithm implementation details.

## 2. Measuring the performance gap of IL algorithms

The proposal of aggregated measures is important for tasks which are evaluated in a large number of configurations [6, 8]. Building on previous work regarding such measures, the authors of [8] list eight criteria which should be met by global evaluation metrics when evaluating universal visual representations: (1) coherent aggregation, (2) significance, (3) merit bonus, (4) penalty malus, (5) penalty for damage, (6) independence to outliers, (7) independence to reference and (8) time consistency. They note that none of the global evaluation measures can fulfill all criteria simultaneously. However, their formulation which inspired us to propose  $G_{IL}$  fulfills the maximum number of criteria. While the IL context is different from that of universal representations, a majority of criteria from [8] are relevant here. The aggregation is easier in our work since the use of  $Full$  as reference score is a natural upper bound for incremental learning algorithms. The aggregation of scores is natural in  $G_{IL}$  since all scores are compared to a single reference. The significance criterion, put forward in [6] is only implicitly modeled because configurations which give the largest gain contribute more to the global score. The merit bonus refers to the proportionality of the reward with respect to the reference method and is modeled through the denominator of Equation 3 of the paper. The penalty for

damage and the penalty malus are not applicable since all methods penalize the performance compared to the upper bound. The independence to outlier methods has low effect in our case since it refers to the contributions of individual configurations. Since  $G_{IL}$  averages the contributions of a relatively large number of contributions, the risk related to outliers is rather reduced. Naturally, the more datasets and configurations are tested, the more robust the score will be. However, the computational resources needed for training in IL are large and we consider that the use of four datasets, with three memory sizes and three incremental learning splits gives a fair idea about the behavior of each algorithm. Time consistency is respected since methods are not compared to each other but only to a reference which is stable if the same deep model and data are used across time. A question remains whether datasets of different sizes should be given the same weights in the score but using weighting would further complicate the evaluation measure.

## 3. Fine tuning without memory

| States           | $\mathcal{Z} = 10$ |          |           |           |
|------------------|--------------------|----------|-----------|-----------|
| Dataset          | ILSVRC             | VGGFace2 | Landmarks | CIFAR-100 |
| $LwF$            | 43.80              | 48.30    | 46.34     | 79.49     |
| $FT^{noMem}$     | 20.64              | 21.28    | 21.29     | 21.27     |
| $FT^{L2}$        | 20.64              | 21.27    | 21.27     | 21.27     |
| $FT_{init}$      | 60.95              | 90.90    | 68.77     | 55.05     |
| $FT_{init}^{L2}$ | 51.57              | 76.84    | 61.42     | 47.48     |
| $ScaIL$          | 21.96              | 23.06    | 22.31     | 33.49     |

Table 1: Top-5 accuracy of fine tuning without memory ( $\mathcal{B} = 0$ ) for the four datasets with  $\mathcal{Z} = 10$  states. For reference, we also present  $LwF$  [3], which is equivalent to  $iCaRL$  [7] without memory.

Table 1 provides results obtained with fine tuning without memory for past classes ( $\mathcal{B} = 0$ ) and  $\mathcal{Z} = 10$  states. Trends are similar for the other  $\mathcal{Z}$  values tested in the paper which are not presented here. The accuracy drops signif-

icantly for  $FT$  since the network cannot rehearse knowledge related to past classes. Catastrophic forgetting is more severe and past classes become unrecognizable in the current state. The accuracy of  $FT^{noMem}$  is mostly due to the recognition rate of new classes. When  $Z = 10$ , they represent between a half and a tenth of the total number of classes for states  $S = 1$  and  $S = 9$ , the first and the last incremental state respectively. The accuracy for past classes is close to random. Since  $ScaIL$  depends heavily on the weights of past classes in the current state, its performance drops significantly.  $LwF$  [3] includes a distillation component which is clearly useful in absence of memory. It outperforms  $FT$  and  $ScaIL$  for all datasets by a very large margin. This finding reinforces the conclusions of [7] regarding the positive role of distillation in incremental learning without memory.

#### 4. Supplementary experiments related to distillation in IL

In Figure 1, we provide detailed top-5 accuracy per incremental state for  $FT$ ,  $FT^{distill}$  and  $iCaRL$  for  $\mathcal{B} = 0.5\%$  and  $Z = 50$  states. The largest value of  $Z$  from the paper was chosen in order to observe the behavior with and without distillation for a small number of classes per incremental state. For ILSVRC, VGGFace2 and Landmarks, the difference between  $FT$  and  $FT^{distill}$  is small for initial incremental states, increases a lot afterwards and tends to decrease toward the end of the process but remains very large. This behavior is explained by the fact that, since past memory is only  $\mathcal{B} = 0.5\%$ , the number of exemplars per class becomes very small toward the end. For instance,  $\mathcal{B}$  includes 5000 images for ILSVRC and there will be only 5 exemplars per class in the last states of the incremental process. It is noticeable that rehearsal in  $FT$  still works with such a small number of exemplars. These finding provides further support to the results reported in the paper regarding the negative role of distillation at large scale for imbalanced datasets when a memory of the past is available. Confirming the results from [7], distillation is indeed useful for CIFAR-100, where its performance is slightly better than that of  $FT$ . Also, the introduction of an external classifier in  $iCaRL$  is clearly useful.

In Table 2 and Figure 2, we extend the analysis of top-1 types of errors presented in Table 2 and Figure 4 of the paper to the four datasets. The  $e(p, p)$  errors related to the last incremental state are overrepresented for all four datasets compared. However, the errors toward the first incremental state are also better represented for VGGFace2 and even become dominant for Landmarks and CIFAR-100. This behavior is probably due to the fact that the initial state is stronger for easier tasks. In these cases, the model evolves to a lesser extent compared to ILSVRC, a more complex visual task.

|                |           | Incremental states |       |       |       |       |       |       |       |       |
|----------------|-----------|--------------------|-------|-------|-------|-------|-------|-------|-------|-------|
|                |           | $S^1$              | $S^2$ | $S^3$ | $S^4$ | $S^5$ | $S^6$ | $S^7$ | $S^8$ | $S^9$ |
|                |           | ILSVRC             |       |       |       |       |       |       |       |       |
| $FT$           | $c(p)$    | 2117               | 2995  | 3415  | 3875  | 3653  | 4451  | 4558  | 5003  | 3119  |
|                | $e(p, p)$ | 156                | 450   | 807   | 1363  | 1842  | 2710  | 2626  | 3932  | 2388  |
|                | $e(p, n)$ | 2727               | 6555  | 10778 | 14762 | 19505 | 22839 | 27816 | 31065 | 39493 |
|                | $c(n)$    | 4151               | 4322  | 4103  | 4141  | 4267  | 4304  | 4247  | 4378  | 4248  |
|                | $e(n, n)$ | 809                | 638   | 875   | 828   | 716   | 674   | 743   | 595   | 741   |
|                | $e(n, p)$ | 40                 | 40    | 22    | 31    | 17    | 22    | 10    | 27    | 11    |
| $FT^{distill}$ | $c(p)$    | 850                | 1008  | 1355  | 1355  | 1195  | 1344  | 1419  | 1543  | 1562  |
|                | $e(p, p)$ | 472                | 1746  | 3700  | 4999  | 6904  | 8246  | 10771 | 13400 | 14556 |
|                | $e(p, n)$ | 3678               | 7246  | 9945  | 13646 | 16901 | 20410 | 22810 | 25057 | 28882 |
|                | $c(n)$    | 3645               | 3834  | 3597  | 3607  | 3744  | 3754  | 3605  | 3766  | 3662  |
|                | $e(n, n)$ | 1043               | 793   | 928   | 905   | 785   | 776   | 828   | 692   | 751   |
|                | $e(n, p)$ | 312                | 373   | 475   | 488   | 471   | 470   | 567   | 542   | 587   |
|                |           | VGGFace2           |       |       |       |       |       |       |       |       |
| $FT$           | $c(p)$    | 4168               | 7718  | 11062 | 14293 | 15953 | 19614 | 21075 | 24690 | 24196 |
|                | $e(p, p)$ | 89                 | 282   | 611   | 947   | 1354  | 2170  | 3203  | 3827  | 4929  |
|                | $e(p, n)$ | 743                | 2000  | 3327  | 4760  | 7693  | 8216  | 10722 | 11483 | 15875 |
|                | $c(n)$    | 4825               | 4834  | 4866  | 4865  | 4881  | 4879  | 4887  | 4874  | 4883  |
|                | $e(n, n)$ | 155                | 143   | 118   | 119   | 108   | 102   | 101   | 108   | 108   |
|                | $e(n, p)$ | 20                 | 23    | 16    | 16    | 11    | 19    | 12    | 18    | 9     |
| $FT^{distill}$ | $c(p)$    | 1729               | 2109  | 1886  | 1787  | 1520  | 1657  | 1412  | 1199  | 1131  |
|                | $e(p, p)$ | 242                | 1455  | 2553  | 3360  | 4056  | 5766  | 6248  | 6506  | 7838  |
|                | $e(p, n)$ | 3029               | 6436  | 10561 | 14853 | 19424 | 22577 | 27340 | 32295 | 36031 |
|                | $c(n)$    | 4620               | 4637  | 4694  | 4740  | 4747  | 4714  | 4693  | 4685  | 4728  |
|                | $e(n, n)$ | 299                | 239   | 236   | 203   | 212   | 224   | 218   | 248   | 216   |
|                | $e(n, p)$ | 81                 | 124   | 70    | 57    | 41    | 62    | 89    | 67    | 56    |
|                |           | Landmarks          |       |       |       |       |       |       |       |       |
| $FT$           | $c(p)$    | 1670               | 3072  | 4476  | 5550  | 6564  | 7626  | 8081  | 9303  | 10309 |
|                | $e(p, p)$ | 38                 | 131   | 318   | 616   | 879   | 1005  | 1340  | 1961  | 2237  |
|                | $e(p, n)$ | 292                | 797   | 1206  | 1834  | 2557  | 3369  | 4579  | 4736  | 5454  |
|                | $c(n)$    | 1945               | 1970  | 1959  | 1956  | 1973  | 1966  | 1975  | 1973  | 1971  |
|                | $e(n, n)$ | 51                 | 27    | 35    | 37    | 24    | 27    | 25    | 23    | 27    |
|                | $e(n, p)$ | 4                  | 3     | 6     | 7     | 3     | 7     | 0     | 4     | 2     |
| $FT^{distill}$ | $c(p)$    | 901                | 1011  | 859   | 815   | 788   | 769   | 622   | 533   | 419   |
|                | $e(p, p)$ | 159                | 831   | 1770  | 2617  | 3194  | 3880  | 4708  | 5889  | 6744  |
|                | $e(p, n)$ | 940                | 2158  | 3371  | 4568  | 6018  | 7351  | 8670  | 9578  | 10837 |
|                | $c(n)$    | 1893               | 1893  | 1902  | 1910  | 1937  | 1913  | 1949  | 1926  | 1936  |
|                | $e(n, n)$ | 66                 | 53    | 58    | 61    | 37    | 53    | 36    | 52    | 38    |
|                | $e(n, p)$ | 41                 | 54    | 40    | 29    | 26    | 34    | 15    | 22    | 26    |
|                |           | CIFAR-100          |       |       |       |       |       |       |       |       |
| $FT$           | $c(p)$    | 366                | 614   | 675   | 605   | 686   | 950   | 779   | 692   | 467   |
|                | $e(p, p)$ | 10                 | 181   | 312   | 288   | 641   | 974   | 835   | 732   | 601   |
|                | $e(p, n)$ | 624                | 1205  | 2013  | 3107  | 3673  | 4076  | 5386  | 6576  | 7932  |
|                | $c(n)$    | 791                | 873   | 886   | 866   | 848   | 859   | 834   | 888   | 915   |
|                | $e(n, n)$ | 196                | 114   | 103   | 131   | 146   | 127   | 159   | 104   | 80    |
|                | $e(n, p)$ | 13                 | 13    | 11    | 3     | 6     | 14    | 7     | 8     | 5     |
| $FT^{distill}$ | $c(p)$    | 719                | 1160  | 1507  | 1706  | 1988  | 2195  | 2349  | 2404  | 2251  |
|                | $e(p, p)$ | 91                 | 457   | 847   | 1210  | 1800  | 2551  | 2929  | 3499  | 3743  |
|                | $e(p, n)$ | 190                | 383   | 646   | 1084  | 1212  | 1254  | 1722  | 2097  | 3006  |
|                | $c(n)$    | 694                | 742   | 735   | 752   | 723   | 767   | 708   | 786   | 814   |
|                | $e(n, n)$ | 78                 | 62    | 40    | 53    | 48    | 35    | 57    | 38    | 28    |
|                | $e(n, p)$ | 228                | 196   | 225   | 195   | 229   | 198   | 235   | 176   | 158   |

Table 2: Top-1 correct and wrong classifications for vanilla fine tuning ( $FT$ ) and fine tuning with distillation ( $FT^{distill}$ ) for the four datasets with  $Z = 10$  and  $\mathcal{B} = 0.5\%$ .

#### 5. Algorithm implementation details

We used the Github<sup>1</sup> public implementation from [7] to run  $iCaRL$  on TensorFlow [1] with the same hyperparameters and training settings provided by the authors. Hyperparameters are as follows:  $lr = 2.0$ ,  $weight\ decay = 0.00001$ ,  $momentum = 0.9$ ,  $batch\ size = 128$ .  $iCaRL$  was run with a total of 60 epochs for the large datasets and for 70 epochs for CIFAR-100. The learning rate is divided by 5 at  $epoch = \{20, 30, 40, 50\}$  for the large datasets and

<sup>1</sup><https://github.com/srebuffi/iCaRL>

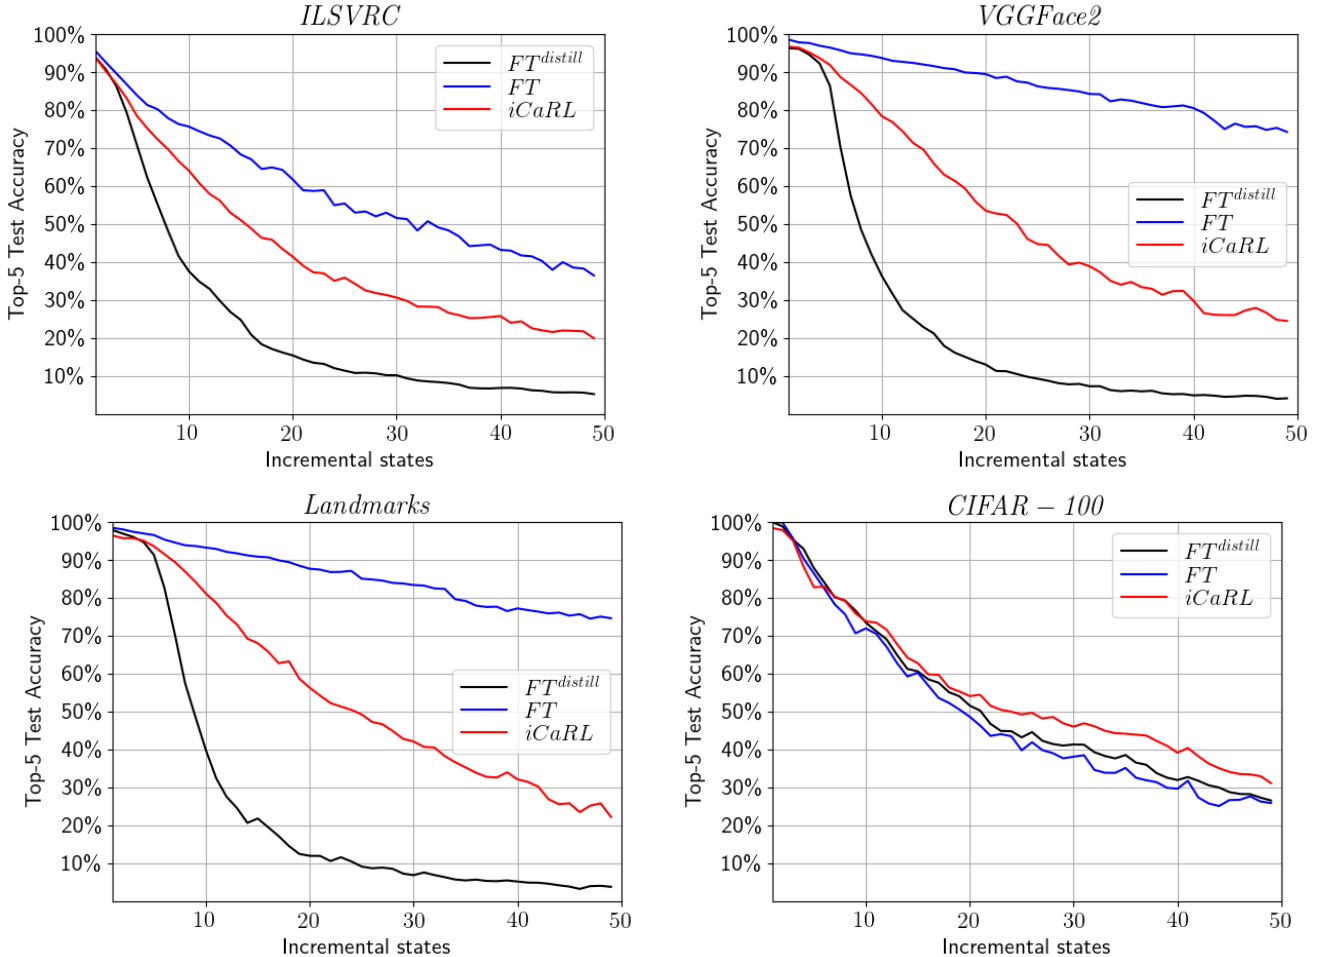

Figure 1: Detailed Top-5 Test accuracy for the four datasets with  $\mathcal{Z} = 50$  and memory  $\mathcal{B} = 0.5\%$ . In this experiment, a comparison is done between  $FT$ ,  $FT^{distill}$  and  $iCaRL$  to analyze the role of distillation.

at  $epoch = \{49, 63\}$  for CIFAR-100. We tried to optimize the learning process by changing hyperparameters but couldn't improve the results presented by the original authors.

*BiC* [9] was also run using the public Github implementation<sup>2</sup> provided by the authors and the same hyperparameters.

All the other methods were implemented in Pytorch [4] with  $batch\ size = 256$  (128 for CIFAR-100),  $weight\ decay = 0.0001$  (0.0005 for CIFAR-100) and a  $momentum = 0.9$ . The first non-incremental state was trained for 100 epochs for large datasets and 300 epochs for CIFAR-100. The learning rate is set to 0.1 and divided by 10 when the error plateaus for 10 consecutive epochs (60 epochs for CIFAR-100).  $FT$  was run for 35 epochs (60 epochs for CIFAR-100). The only change compared to the standard training was to set initial learning rate per incre-

<sup>2</sup><https://github.com/wuyuebupt/LargeScaleIncrementalLearning>

mental state at  $lr = \frac{0.1}{k+1}$ , with  $1 \leq k \leq \mathcal{Z} - 1$ . This results in a gain of less than 1 top-5 accuracy point for ILSVRC with  $\mathcal{Z} = 10$  and  $\mathcal{B} = 0.5\%$ . During training, the learning rate is divided by 10 when the error plateaus for 5 epochs (15 epochs for CIFAR-100).

The balanced fine tuning performed after  $FT$  in  $FT^{BAL}$  was run for 15 more epochs (30 epochs for CIFAR-100) and the learning rate is reinitialized to  $lr = \frac{0.01}{k+1}$ . We also tried to initialize the balanced fine tuning with  $lr = \frac{0.1}{k+1}$  and continue from the last learning rate of the imbalanced fine tuning but results were lower. Equally important, training with more epochs did not provide any gain.

The fixed representation in *DeeSIL* [2] is trained only with data from the first incremental batch. No external data was used to ensure that the method is comparable with the others. SVM training is done using the *scikit-learn* framework [5]. SVMs were optimized by dividing the IL training set to  $\frac{90}{10}$  train/val subsets

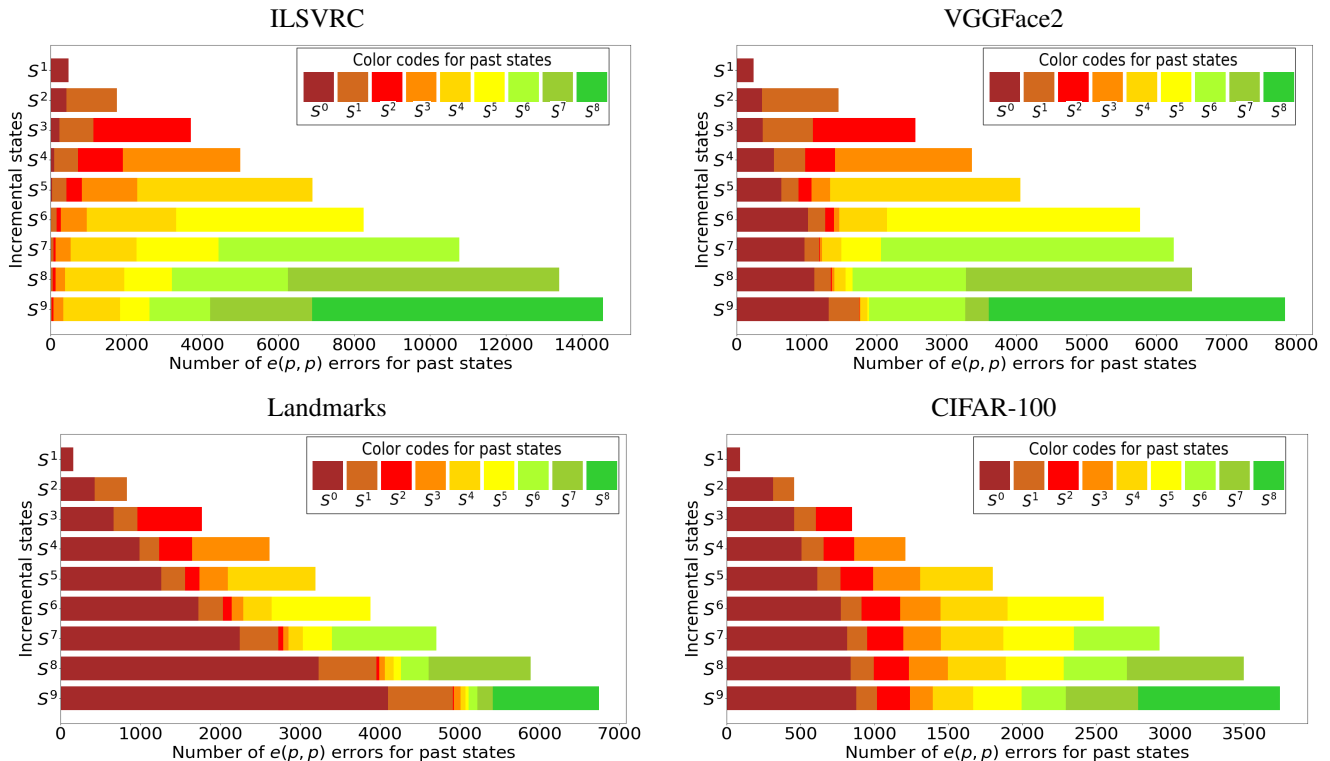

Figure 2: Detail of past-past errors  $e(p, p)$  for individual states of  $FT^{distill}$  on the four datasets with  $\mathcal{Z} = 10$  and  $\mathcal{B} = 0.5\%$ . In each state, errors due to the latest past state are over-represented as a result of learning its associated state with an imbalanced training set. *Best viewed in color.*

and iterate through the values of the regularizer  $C = \{0.0001, 0.001, 0.01, 1, 10, 100, 1000\}$ . The optimal value was retained for each dataset configuration. SVMs are optimized only for the non-incremental state. The regularizer is then frozen and used for the subsequent incremental states. We used the default values of the other hyper-parameters provided in *sklearn*.

## References

- [1] M. Abadi, P. Barham, J. Chen, Z. Chen, A. Davis, J. Dean, M. Devin, S. Ghemawat, G. Irving, M. Isard, M. Kudlur, J. Levenberg, R. Monga, S. Moore, D. G. Murray, B. Steiner, P. A. Tucker, V. Vasudevan, P. Warden, M. Wicke, Y. Yu, and X. Zhang. Tensorflow: A system for large-scale machine learning. *CoRR*, abs/1605.08695, 2016.
- [2] E. Belouadah and A. Popescu. Deesil: Deep-shallow incremental learning. In *Computer Vision - ECCV 2018 Workshops - Munich, Germany, September 8-14, 2018, Proceedings, Part II*, pages 151–157, 2018.
- [3] K. He, X. Zhang, S. Ren, and J. Sun. Deep residual learning for image recognition. In *Conference on Computer Vision and Pattern Recognition*, CVPR, 2016.
- [4] A. Paszke, S. Gross, S. Chintala, G. Chanan, E. Yang, Z. DeVito, Z. Lin, A. Desmaison, L. Antiga, and A. Lerer. Automatic differentiation in pytorch. In *Advances in Neural Information Processing Systems Workshops*, NIPS-W, 2017.
- [5] F. Pedregosa, G. Varoquaux, A. Gramfort, V. Michel, B. Thirion, O. Grisel, M. Blondel, P. Prettenhofer, R. Weiss, V. Dubourg, J. VanderPlas, A. Passos, D. Cournapeau, M. Brucher, M. Perrot, and E. Duchesnay. Scikit-learn: Machine learning in python. *CoRR*, abs/1201.0490, 2012.
- [6] S. Rebuffi, H. Bilen, and A. Vedaldi. Learning multiple visual domains with residual adapters. In *Advances in Neural Information Processing Systems 30: Annual Conference on Neural Information Processing Systems 2017, 4-9 December 2017, Long Beach, CA, USA*, pages 506–516, 2017.
- [7] S. Rebuffi, A. Kolesnikov, G. Sperl, and C. H. Lampert. icarl: Incremental classifier and representation learning. In *Conference on Computer Vision and Pattern Recognition*, CVPR, 2017.
- [8] Y. Tamaazousti, H. Le Borgne, C. Hudelot, M. E. A. Seddik, and M. Tamaazousti. Learning more universal representations for transfer-learning. *arXiv:1712.09708*, 2017.
- [9] Y. Wu, Y. Chen, L. Wang, Y. Ye, Z. Liu, Y. Guo, and Y. Fu. Large scale incremental learning. In *IEEE Conference on Computer Vision and Pattern Recognition, CVPR 2019, Long Beach, CA, USA, June 16-20, 2019*, pages 374–382, 2019.
